# Supplementary figures and images for: Craniofacial Fracture with Superior Orbital Fissure Syndrome Resulting in Pupil-sparing Oculomotor Nerve Palsy
Source: PubMed Central journal article supplement — Plast Reconstr Surg Glob Open. 2024 May 17;12(5):e5828. doi: 10.1097/GOX.0000000000005828 (PMC11124695; doi:10.1097/gox.0000000000005828), 2024-05-17

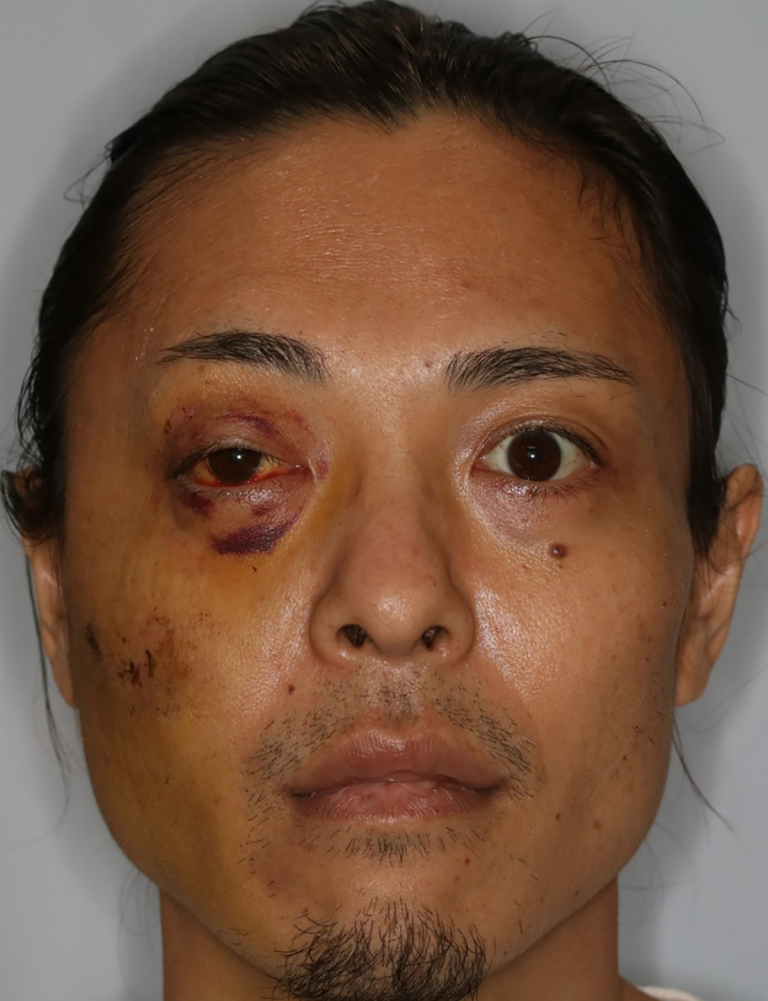

Supplement: gox-12-e5828-s001.pdf [file gox-12-e5828-s001.pdf]

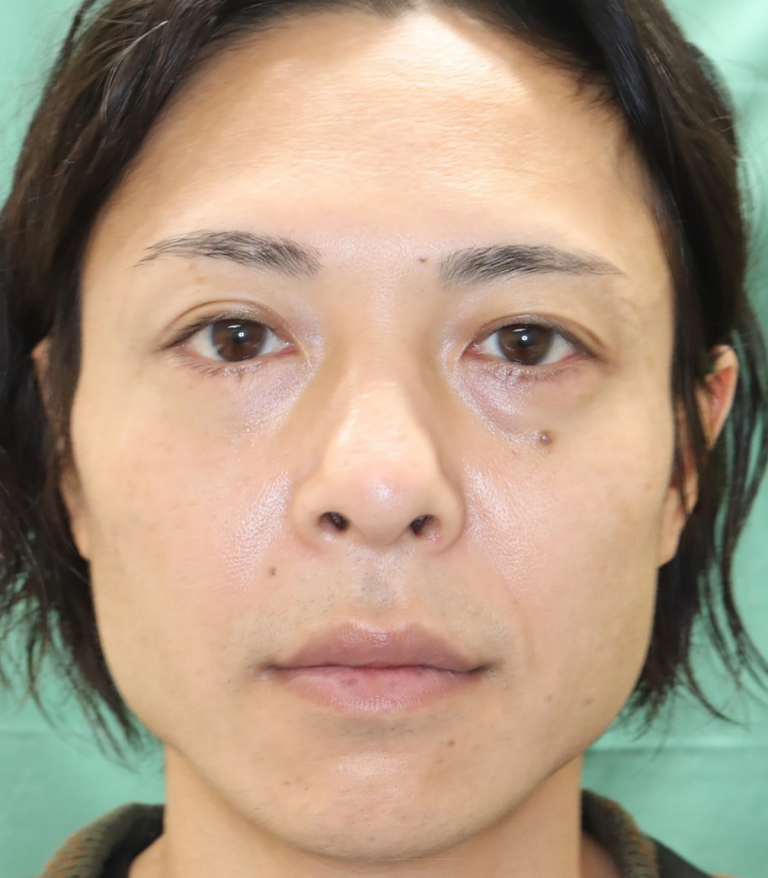

Supplement: gox-12-e5828-s002.pdf [file gox-12-e5828-s002.pdf]
